# Supplementary material
Source: publisher figshare collection journal article supplement (https://gsajournals.figshare.com/ndownloader/files/26826998)
Supplement: Supplementary file 1 [file 26826998]

## Sheet: spi1a_1_adultSC
Supplemental Table 6 - NGS reads and read counts for spi1a_1 (adult SCs)
WT reference sequence:
TTTTTGACAGTAATATTTGGCATGACTTTAAAACCAATGTCAATTTCTACAGGAAACAAAAGGAAGGTGCGTCTTTACCAGTTCCTCCTGGACCTCCTTCAGGACGGAGACATGAGGGACTGCATCTGGTGGGTGGACAGAGAGCGAGGCGTCTTTCAGTTCTCCTCCAAACACAAGGAGACACTCGCCAGCCGCTGGGGCCAGCAAAAGGGCAACCGCAAGAGAATGACCTACCAAAAGATGGCAAGAGCCCTCCGCAACTACGGCAAGACCGGGGAGGTCAAAAAGGTCAAGAAGAAACTCACCT , WT
Sequence																									Read Count	Read %
INJECTED #1
TTTTTGACAGTAATATTTGGCATGACTTTAAAACCAATGTCAATTTCTACAGGAAACAAAAGGAAGGTGCGTCTTTACCAGTTCCTCCTGGACCTCCTTCAGGACGGAGACATGAGGGACTGCATCTGGTGGGTGGACAGAGAGCGAGGCGTCTTTCAGTTCTCCTCCAAACACAAGGAGACACTCGCCAGCCGCTGGGGCCAGCAAAAGGGCAACCGCAAGAGAATGACCTACCAAAAGATGGCAAGAGCCCTCCGCAACTACGGCAAGACCGGGGAGGTCAAAAAGGTCAAGAAGAAACTCACCT , WT																									145	5.00518
TTTTTGACAGTAATATTTGGCATGACTTTAAAACCAATGTCAATTTCTACAGGAAACAAAAGGAAGGTGCGTCTTTACCAGTTCCTCCTGGACCTCCTTCAGGACGGAGACATGAGGGACTGCATCTGGTGGGTGGACAGAGAGCGAGGCGTCTTTCAGTTCTCCTCCAAACACAAGGAGACACTCGCCAGCCGGGGCCAGCAAAAGGGCAACCGCAAGAGAATGACCTACCAAAAGATGGCAAGAGCCCTCCGCAACTACGGCAAGACCGGGGAGGTCAAAAAGGTCAAGAAGAAACTCACCT , 761																									761	26.2686
TTTTTGACAGTAATATTTGGCATGACTTTAAAACCAATGTCAATTTCTACAGGAAACAAAAGGAAGGTGCGTCTTTACCAGTTCCTCCTGGACCTCCTTCAGGACGGAGACATGAGGGACTGCATCTGGTGGGTGGACAGAGAGCGAGGCGTCTTTCAGTTCTCCTCCAAACACAAGGAGACACTCGCCAGCAAAAGGGCAACCGCAAGAGAATGACCTACCAAAAGATGGCAAGAGCCCTCCGCAACTACGGCAAGACCGGGGAGGTCAAAAAGGTCAAGAAGAAACTCACCT , 603																									603	20.8146
TTTTTGACAGTAATATTTGGCATGACTTTAAAACCAATGTCAATTTCTACAGGAAACAAAAGGAAGGTGCGTCTTTACCAGTTCCTCCTGGACCTCCTTCAGGACGGAGACATGAGGGACTGCATCTGGTGGGTGGACAGAGAGCGAGGCGTCTTTCAGTTCTCCTCCAAACACAAGGAGACACTCGCCAGCAAACTGGGGCCAGCAAAAGGGCAACCGCAAGAGAATGACCTACCAAAAGATGGCAAGAGCCCTCCGCAACTACGGCAAGACCGGGGAGGTCAAAAAGGTCAAGAAGAAACTCACCT , 257																									257	8.87125
TTTTTGACAGTAATATTTGGCATGACTTTAAAACCAATGTCAATTTCTACAGGAAACAAAAGGAAGGTGCGTCTTTACCAGTTCCTCCTGGACCTCCTTCAGGACGGAGACATGAGGGACTGCATCTGGTGGGTGGACAGAGAGCGAGGCGTCTTTCAGTTCTCCTCCAAACACAAGGAGACACTCGCCAGCCAGCAAAAGGGCAACCGCAAGAGAATGACCTACCAAAAGATGGCAAGAGCCCTCCGCAACTACGGCAAGACCGGGGAGGTCAAAAAGGTCAAGAAGAAACTCACCT , 227																									227	7.83569
TTTTTGACAGTAATATTTGGCATGACTTTAAAACCAATGTCAATTTCTACAGGAAACAAAAGGAAGGTGCGTCTTTACCAGTTCCTCCTGGACCTCCTTCAGGACGGAGACATGAGGGACTGCATCTGGTGGGTGGACAGAGAGCGAGGCGTCTTTCAGTTCTCCTCCAAACACAAGGAGACACTCGCCTGGGGCCAGCAAAAGGGCAACCGCAAGAGAATGACCTACCAAAAGATGGCAAGAGCCCTCCGCAACTACGGCAAGACCGGGGAGGTCAAAAAGGTCAAGAAGAAACTCACCT , 192																									192	6.62755
TTTTTGACAGTAATATTTGGCATGACTTTAAAACCAATGTCAATTTCTACAGGAAACAAAAGGAAGGTGCGTCTTTACCAGTTCCTCCTGGACCTCCTTCAGGACGGAGACATGAGGGACTGCATCTGGTGGGTGGACAGAGAGCGAGGCGTCTTTCAGTTCTCCTCCAAACACAAGGAGACACTCGCCAGCTGGGGCCAGCAAAAGGGCAACCGCAAGAGAATGACCTACCAAAAGATGGCAAGAGCCCTCCGCAACTACGGCAAGACCGGGGAGGTCAAAAAGGTCAAGAAGAAACTCACCT , 165																									165	5.69555
TTTTTGACAGTAATATTTGGCATGACTTTAAAACCAATGTCAATTTCTACAGGAAACAAAAGGAAGGTGCGTCTTTACCAGTTCCTCCTGGACCTCCTTCAGGACGGAGACATGAGGGACTGCATCTGGTGGGTGGACAGAGAGCGAGGCGTCTTTCAGTTCTCCTCCAAACACAAGGAGACACTCGCCAGCCGCTGGGGCCAGCAAAAGGGCAACCGCAAGAGAATGACCTACCAAAAGATGGCAAGAGCCCTCCGCAACTACGGCAAGACCGGGGAGGTCAAAAAGGTCAAGAAGAAACTCACCT , 122																									122	4.21125
TTTTTGACAGTAATATTTGGCATGACTTTAAAACCAATGTCAATTTCTACAGGAAACAAAAGGAAGGTGCGTCTTTACCAGTTCCTCCTGGACCTCCTTCAGGACGGAGACATGAGGGACTGCATCTGGTGGGTGGACAGAGAGCGAGGCGTCTTTCAGTTCTCCTCCAAACACAAGGAGACACTCGCCAGCCGAGCCTGGGGCCAGCAAAAGGGCAACCGCAAGAGAATGACCTACCAAAAGATGGCAAGAGCCCTCCGCAACTACGGCAAGACCGGGGAGGTCAAAAAGGTCAAGAAGAAACTCACCT , 121																									121	4.17673
TTTTTGACAGTAATATTTGGCATGACTTTAAAACCAATGTCAATTTCTACAGGAAACAAAAGGAAGGTGCGTCTTTACCAGTTCCTCCTGGACCTCCTTCAGGACGGAGACATGAGGGACTGCATCTGGTGGGTGGACAGAGAGCGAGGCGTCTTTCAGTTCTCCTCCAAACACAAGGAGACACTCGCCAGCACAGCTCGCCTGGGGCCAGCAAAAGGGCAACCGCAAGAGAATGACCTACCAAAAGATGGCAAGAGCCCTCCGCAACTACGGCAAGACCGGGGAGGTCAAAAAGGTCAAGAAGAAACTCACCT , 110																									110	3.79703
TTTTTGACAGTAATATTTGGCATGACTTTAAAACCAATGTCAATTTCTACAGGAAACAAAAGGAAGGTGCGTCTTTACCAGTTCCTCCTGGACCTCCTTCAGGACGGAGACATGAGGGACTGCATCTGGTGGGTGGACAGAGAGCGAGGCGTCTTTCAGTTCTCCTCCAAACACAAGGAGACACTCGCCACACGGGGCCAGCAAAAGGGCAACCGCAAGAGAATGACCTACCAAAAGATGGCAAGAGCCCTCCGCAACTACGGCAAGACCGGGGAGGTCAAAAAGGTCAAGAAGAAACTCACCT , 83																									83	2.86503
TTTTTGACAGTAATATTTGGCATGACTTTAAAACCAATGTCAATTTCTACAGGAAACAAAAGGAAGGTGCGTCTTTACCAGTTCCTCCTGGACCTCCTTCAGGACGGAGACATGAGGGACTGCATCTGGTGGGTGGACAGAGAGCGAGGCGTCTTTCAGTTCTCCTCCAAACACAAGGAGACACTCGCCAGCAAAAGGGCAACCGCAGGAGACACTGGGGCCAGCAAAAGGGCAACCGCAAGAGAATGACCTACCAAAAGATGGCAAGAGCCCTCCGCAACTACGGCAAGACCGGGGAGGTCAAAAAGGTCAAGAAGAAACTCACCT , 61																									61	2.10563
TTTTTGACAGTAATATTTGGCATGACTTTAAAACCAATGTCAATTTCTACAGGAAACAAAAGGAAGGTGCGTCTTTACCAGTTCCTCCTGGACCTCCTTCAGGACGGAGACATGAGGGACTGCATCTGGTGGGTGGACAGAGAGCGAGGCGTCTTTCAGTTCTCCTCCAAACGAGAGGAGAATGCCCTCACACTGGGGCCAGCAAAAGGGCAACCGCAAGAGAATGACCTACCAAAAGATGGCAAGAGCCCTCCGCAACTACGGCAAGACCGGGGAGGTCAAAAAGGTCAAGAAGAAACTCACCT , 50																									50	1.72592
INJECTED #2
TTTTTGACAGTAATATTTGGCATGACTTTAAAACCAATGTCAATTTCTACAGGAAACAAAAGGAAGGTGCGTCTTTACCAGTTCCTCCTGGACCTCCTTCAGGACGGAGACATGAGGGACTGCATCTGGTGGGTGGACAGAGAGCGAGGCGTCTTTCAGTTCTCCTCCAAACACAAGGAGACACTCGCCAGCCGCTGGGGCCAGCAAAAGGGCAACCGCAAGAGAATGACCTACCAAAAGATGGCAAGAGCCCTCCGCAACTACGGCAAGACCGGGGAGGTCAAAAAGGTCAAGAAGAAACTCACCT , WT																									0	0
TTTTTGACAGTAATATTTGGCATGACTTTAAAACCAATGTCAATTTCTACAGGAAACAAAAGGAAGGTGCGTCTTTACCAGTTCCTCCTGGACCTCCTTCAGGACGGAGACATGAGGGACTGCATCTGGTGGGTGGACAGAGAGCGAGGCGTCTTTCAGTTCTCCTCCAAACACAAGGAGACACTCGCCAGCCGGGGCCAGCAAAAGGGCAACCGCAAGAGAATGACCTACCAAAAGATGGCAAGAGCCCTCCGCAACTACGGCAAGACCGGGGAGGTCAAAAAGGTCAAGAAGAAACTCACCT , 526																									526	38.8192
TTTTTGACAGTAATATTTGGCATGACTTTAAAACCAATGTCAATTTCTACAGGAAACAAAAGGAAGGTGCGTCTTTACCAGTTCCTCCTGGACCTCCTTCAGGACGGAGACATGAGGGACTGCATCTGGTGGGTGGACAGAGAGCGAGGCGTCTTTCAGTTCTCCTCCAAACACAAGGAGACACTCGCCAGCCGGCAAAAGGGCAACCGCAAGAGAATGACCTACCAAAAGATGGCAAGAGCCCTCCGCAACTACGGCAAGACCGGGGAGGTCAAAAAGGTCAAGAAGAAACTCACCT , 229																									229	16.9004
TTTTTGACAGTAATATTTGGCATGACTTTAAAACCAATGTCAATTTCTACAGGAAACAAAAGGAAGGTGCGTCTTTACCAGTTCCTCCTGGACCTCCTTCAGGACGGAGACATGAGGGACTGCATCTGGTGGGTGGACAGAGAGCGAGGCGTCTTTCAGTTCTCCTCCAAACACAAGGAGACACTCGCCAGCCGTTTCGTTGGGGCCAGCAAAAGGGCAACCGCAAGAGAATGACCTACCAAAAGATGGCAAGAGCCCTCCGCAACTACGGCAAGACCGGGGAGGTCAAAAAGGTCAAGAAGAAACTCACCT , 179																									179	13.2103
TTTTTGACAGTAATATTTGGCATGACTTTAAAACCAATGTCAATTTCTACAGGAAACAAAAGGAAGGTGCGTCTTTACCAGTTCCTCCTGGACCTCCTTCAGGACGGAGACATGAGGGACTGCATCTGGTGGGTGGACAGAGAGCGAGGCGTCTTTCAGTTCTCCTCCAAACACAAGGAGACACTCGCCAGCCATTTCGTTGGGGCCAGCAAAAGGGCAACCGCAAGAGAATGACCTACCAAAAGATGGCAAGAGCCCTCCGCAACTACGGCAAGACCGGGGAGGTCAAAAAGGTCAAGAAGAAACTCACCT , 166																									166	12.2509
TTTTTGACAGTAATATTTGGCATGACTTTAAAACCAATGTCAATTTCTACAGGAAACAAAAGGAAGGTGCGTCTTTACCAGTTCCTCCTGGACCTCCTTCAGGACGGAGACATGAGGGACTGCATCTGGTGGGTGGACAGAGAGCGAGGCGTCTTTCAGTTCTCCTCCAAACACAAGGAGACACTCGCCAGCAAAAGGGCAACCGCAAGAGAATGACCTACCAAAAGATGGCAAGAGCCCTCCGCAACTACGGCAAGACCGGGGAGGTCAAAAAGGTCAAGAAGAAACTCACCT , 91																									91	6.71587
TTTTTGACAGTAATATTTGGCATGACTTTAAAACCAATGTCAATTTCTACAGGAAACAAAAGGAAGGTGCGTCTTTACCAGTTCCTCCTGGACCTCCTTCAGGACGGAGACATGAGGGACTGCATCTGGTGGGTGGACAGAGAGCGAGGCGTCTTTCAGTTCTCCTCCAAACACAAGGAGACACTCGCCAGCCTACTGGGGCCAGCAAAAGGGCAACCGCAAGAGAATGACCTACCAAAAGATGGCAAGAGCCCTCCGCAACTACGGCAAGACCGGGGAGGTCAAAAAGGTCAAGAAGAAACTCACCT , 44																									44	3.24723
TTTTTGACAGTAATATTTGGCATGACTTTAAAACCAATGTCAATTTCTACAGGAAACAAAAGGAAGGTGCGTCTTTACCAGTTCCTCCTGGACCTCCTTCAGGACGGAGACATGAGGGACTGCATCTGGTGGGTGGACAGAGAGCGAGGCGTCTTTCAGTTCTCCTCCAAACACAAGGAGACACTGGGGCCAGCAAAAGGGCAACCGCAAGAGAATGACCTACCAAAAGATGGCAAGAGCCCTCCGCAACTACGGCAAGACCGGGGAGGTCAAAAAGGTCAAGAAGAAACTCACCT , 23																									23	1.69742
TTTTTGACAGTAATATTTGGCATGACTTTAAAACCAATGTCAATTTCTACAGGAAACAAAAGGAAGGTGCGTCTTTACCAGTTCCTCCTGGACCTCCTTCAGGACGGAGACATGAGGGACTGCATCTGGTGGGTGGACAGAGAGCGAGGCGTCTTTCAGTTCTCCTCCAAACACAAGGAGACACTCGCCAGCACTGGGGCACTGGGGCCAGCAAAAGGGCAACCGCAAGAGAATGACCTACCAAAAGATGGCAAGAGCCCTCCGCAACTACGGCAAGACCGGGGAGGTCAAAAAGGTCAAGAAGAAACTCACCT , 23																									23	1.69742
TTTTTGACAGTAATATTTGGCATGACTTTAAAACCAATGTCAATTTCTACAGGAAACAAAAGGAAGGTGCGTCTTTACCAGTTCCTCCTGGACCTCCTTCAGGACGGAGACATGAGGGACTGCATCTGGTGGGTGGACAGAGAGCGAGGCGTCTTTCAGTTCTCCTCCAAACACAAGGAGACACTCGCCAGCTGGGGCCAGCAAAAGGGCAACCGCAAGAGAATGACCTACCAAAAGATGGCAAGAGCCCTCCGCAACTACGGCAAGACCGGGGAGGTCAAAAAGGTCAAGAAGAAACTCACCT , 20																									20	1.47601
TTTTTGACAGTAATATTTGGCATGACTTTAAAACCAATGTCAATTTCTACAGGAAACAAAAGGAAGGTGCGTCTTTACCAGTTCCTCCTGGACCTCCTTCAGGACGGAGACATGAGGGACTGCATCTGGTGGGTGGACAGAGAGCGAGGCGTCTTTCAGTTCTCCTCCAAACACAAGGAGACACTCGCCAGCAAAAGGCCAGCAAAAGGGCAACCGCAAGAGAATGACCTACCAAAAGATGGCAAGAGCCCTCCGCAACTACGGCAAGACCGGGGAGGTCAAAAAGGTCAAGAAGAAACTCACCT , 19																									19	1.40221
TTTTTGACAGTAATATTTGGCATGACTTTAAAACCAATGTCAATTTCTACAGGAAACAAAAGGAAGGTGCGTCTTTACCAGTTCCTCCTGGACCTCCTTCAGGACGGAGACATGAGGGACTGCATCTGGTGGGTGGACAGAGAGCGAGGCGTCTTTCAGTTCTCCTCCAAACACAAGGAGACACTCGCCAGCCGGGGGCCAGCAAAAGGGCAACCGCAAGAGAATGACCTACCAAAAGATGGCAAGAGCCCTCCGCAACTACGGCAAGACCGGGGAGGTCAAAAAGGTCAAGAAGAAACTCACCT , 19																									19	1.40221
TTTTTGACAGTAATATTTGGCATGACTTTAAAACCAATGTCAATTTCTACAGGAAACAAAAGGAAGGTGCGTCTTTACCAGTTCCTCCTGGACCTCCTTCAGGACGGAGACATGAGGGACTGCATCTGGTGGGTGGACAGAGAGCGAGGCGTCTTTCAGTTCTCCTCCAAACACAAGCCAGCAAAAGGGCAACCGCAAGAGAATGACCTACCAAAAGATGGCAAGAGCCCTCCGCAACTACGGCAAGACCGGGGAGGTCAAAAAGGTCAAGAAGAAACTCACCT , 16																									16	1.18081
CTGGTGGGTGGACAGAGAGCGAGGCGTCTTTCAGTTCTCCTCCAAACACAAG--------------------------------CCAGCAAAAGGGCAACCGCAAGAGAATGACCTACCAAAAGATGGCAAGAGCCCTCCGCAACTACGG , 16
INJECTED #3
TTTTTGACAGTAATATTTGGCATGACTTTAAAACCAATGTCAATTTCTACAGGAAACAAAAGGAAGGTGCGTCTTTACCAGTTCCTCCTGGACCTCCTTCAGGACGGAGACATGAGGGACTGCATCTGGTGGGTGGACAGAGAGCGAGGCGTCTTTCAGTTCTCCTCCAAACACAAGGAGACACTCGCCAGCCGCTGGGGCCAGCAAAAGGGCAACCGCAAGAGAATGACCTACCAAAAGATGGCAAGAGCCCTCCGCAACTACGGCAAGACCGGGGAGGTCAAAAAGGTCAAGAAGAAACTCACCT , WT																									2	0.174672
TTTTTGACAGTAATATTTGGCATGACTTTAAAACCAATGTCAATTTCTACAGGAAACAAAAGGAAGGTGCGTCTTTACCAGTTCCTCCTGGACCTCCTTCAGGACGGAGACATGAGGGACTGCATCTGGTGGGTGGACAGAGAGCGAGGCGTCTTTCAGTTCTCCTCCAAACACAAGGAGACACTCGCCAGCAAAAGGGCAACCGCAAGAGAATGACCTACCAAAAGATGGCAAGAGCCCTCCGCAACTACGGCAAGACCGGGGAGGTCAAAAAGGTCAAGAAGAAACTCACCT , 428																									428	37.3799
TTTTTGACAGTAATATTTGGCATGACTTTAAAACCAATGTCAATTTCTACAGGAAACAAAAGGAAGGTGCGTCTTTACCAGTTCCTCCTGGACCTCCTTCAGGACGGAGACATGAGGGACTGCATCTGGTGGGTGGACAGAGAGCGAGGCGTCTTTCAGTTCTCCTCCAAACACAAGGAGACACTCGCCAGCCGAGTGTCAGCCTGGGGCCAGCAAAAGGGCAACCGCAAGAGAATGACCTACCAAAAGATGGCAAGAGCCCTCCGCAACTACGGCAAGACCGGGGAGGTCAAAAAGGTCAAGAAGAAACTCACCT , 169																									169	14.7598
TTTTTGACAGTAATATTTGGCATGACTTTAAAACCAATGTCAATTTCTACAGGAAACAAAAGGAAGGTGCGTCTTTACCAGTTCCTCCTGGACCTCCTTCAGGACGGAGACATGAGGGACTGCATCTGGTGGGTGGACAGAGAGCGAGGCGTCTTTCAGTTCTCCTCCAAACACAAGGAGACACTGGGGCCAGCAAAAGGGCAACCGCAAGAGAATGACCTACCAAAAGATGGCAAGAGCCCTCCGCAACTACGGCAAGACCGGGGAGGTCAAAAAGGTCAAGAAGAAACTCACCT , 117																									117	10.2183
TTTTTGACAGTAATATTTGGCATGACTTTAAAACCAATGTCAATTTCTACAGGAAACAAAAGGAAGGTGCGTCTTTACCAGTTCCTCCTGGACCTCCTTCAGGACGGAGACATGAGGGACTGCATCTGGTGGGTGGACAGAGAGCGAGGCGTCTTTCAGTTCTCCTCCAAACACAAGGAGACACTCGCCAGCCGGGGCCAGCAAAAGGGCAACCGCAAGAGAATGACCTACCAAAAGATGGCAAGAGCCCTCCGCAACTACGGCAAGACCGGGGAGGTCAAAAAGGTCAAGAAGAAACTCACCT , 116																									116	10.131
TTTTTGACAGTAATATTTGGCATGACTTTAAAACCAATGTCAATTTCTACAGGAAACAAAAGGAAGGTGCGTCTTTACCAGTTCCTCCTGGACCTCCTTCAGGACGGAGACATGAGGGACTGCATCTGGTGGGTGGACAGAGAGCGAGGCGTCTTTCAGTTCTCCTCCAAACACAAGGAGACACTCGCCAGCCGCAAGACACAAGGGCAAGGAGACACAAGGGCAACCGCAAGAGAATGACCTACCAAAAGATGGCAAGAGCCCTCCGCAACTACGGCAAGACCGGGGAGGTCAAAAAGGTCAAGAAGAAACTCACCT , 69																									69	6.0262
TTTTTGACAGTAATATTTGGCATGACTTTAAAACCAATGTCAATTTCTACAGGAAACAAAAGGAAGGTGCGTCTTTACCAGTTCCTCCTGGACCTCCTTCAGGACGGAGACATGAGGGACTGCATCTGGTGGGTGGACAGAGAGCGAGGCGTCTTTCAGTTCTCCTCCACTGGGGCCAGCAAAAGGGCAACCGCAAGAGAATGACCTACCAAAAGATGGCAAGAGCCCTCCGCAACTACGGCAAGACCGGGGAGGTCAAAAAGGTCAAGAAGAAACTCACCT , 68																									68	5.93886
TTTTTGACAGTAATATTTGGCATGACTTTAAAACCAATGTCAATTTCTACAGGAAACAAAAGGAAGGTGCGTCTTTACCAGTTCCTCCTGGACCTCCTTCAGGACGGAGACATGAGGGACTGCATCTGGTGGGTGGACAGAGAGCGAGGCGTCTTTCAGTTCTCCTCCAAACACAAGGAGACACTCGCCAGCCGGCCAGCAAAAGGGCAACCGCAAGAGAATGACCTACCAAAAGATGGCAAGAGCCCTCCGCAACTACGGCAAGACCGGGGAGGTCAAAAAGGTCAAGAAGAAACTCACCT , 55																									55	4.80349
TTTTTGACAGTAATATTTGGCATGACTTTAAAACCAATGTCAATTTCTACAGGAAACAAAAGGAAGGTGCGTCTTTACCAGTTCCTCCTGGACCTCCTTCAGGACGGAGACATGAGGGACTGCATCTGGTGGGTGGACAGAGAGCGAGGCGTCTTTCAGTTCTCCTCCAAACACAAGGAGACACTCGCTGGGGCCAGCAAAAGGGCAACCGCAAGAGAATGACCTACCAAAAGATGGCAAGAGCCCTCCGCAACTACGGCAAGACCGGGGAGGTCAAAAAGGTCAAGAAGAAACTCACCT , 47																									47	4.1048
TTTTTGACAGTAATATTTGGCATGACTTTAAAACCAATGTCAATTTCTACAGGAAACAAAAGGAAGGTGCGTCTTTACCAGTTCCTCCTGGACCTCCTTCAGGACGGAGACATGAGGGACTGCATCTGGTGGGTGGACAGAGAGCGAGGCGTCTTTCAGTTCTCCTCCAAACACAAGGAGAAGGGCAACCGCAAGAGAATGACCTACCAAAAGATGGCAAGAGCCCTCCGCAACTACGGCAAGACCGGGGAGGTCAAAAAGGTCAAGAAGAAACTCACCT , 23																									23	2.00873
TTTTTGACAGTAATATTTGGCATGACTTTAAAACCAATGTCAATTTCTACAGGAAACAAAAGGAAGGTGCGTCTTTACCAGTTCCTCCTGGACCTCCTTCAGGACGGAGACATGAGGGACTGCATCTGGTGGGTGGACAGAGAGCGAGGCGTCTTTCAGTTCTCCTCCAAACAAAAGGGCAACCGCAAGAGAATGACCTACCAAAAGATGGCAAGAGCCCTCCGCAACTACGGCAAGACCGGGGAGGTCAAAAAGGTCAAGAAGAAACTCACCT , 20																									20	1.74672
TTTTTGACAGTAATATTTGGCATGACTTTAAAACCAATGTCAATTTCTACAGGAAACAAAAGGAAGGTGCGTCTTTACCAGTTCCTCCTGGACCTCCTTCAGGACGGAGACATGAGGGACTGCATCTGGTGGGTGGACAGAGAGCGAGGCGTCTTTCAGTTCTCCTCCAAACACAAGGAGACACTCGCCAGCAAAAACTGGGGCCAGCAAAAGGGCAACCGCAAGAGAATGACCTACCAAAAGATGGCAAGAGCCCTCCGCAACTACGGCAAGACCGGGGAGGTCAAAAAGGTCAAGAAGAAACTCACCT , 17																									17	1.48472
TTTTTGACAGTAATATTTGGCATGACTTTAAAACCAATGTCAATTTCTACAGGAAACAAAAGGAAGGTGCGTCTTTACCAGTTCCTCCTGGACCTCCTTCAGGACGGAGACATGAGGGACTGCATCTGGTGGGTGGACAGAGAGCGAGGCGTCTTTCAGTTCTCCTCCAAACACAAGGAGACACTCGCCAGCCGTCTGGGGCCAGCAAAAGGGCAACCGCAAGAGAATGACCTACCAAAAGATGGCAAGAGCCCTCCGCAACTACGGCAAGACCGGGGAGGTCAAAAAGGTCAAGAAGAAACTCACCT , 14																									14	1.22271
INJECTED #4
TTTTTGACAGTAATATTTGGCATGACTTTAAAACCAATGTCAATTTCTACAGGAAACAAAAGGAAGGTGCGTCTTTACCAGTTCCTCCTGGACCTCCTTCAGGACGGAGACATGAGGGACTGCATCTGGTGGGTGGACAGAGAGCGAGGCGTCTTTCAGTTCTCCTCCAAACACAAGGAGACACTCGCCAGCCGCTGGGGCCAGCAAAAGGGCAACCGCAAGAGAATGACCTACCAAAAGATGGCAAGAGCCCTCCGCAACTACGGCAAGACCGGGGAGGTCAAAAAGGTCAAGAAGAAACTCACCT , WT																									27	1.93966
TTTTTGACAGTAATATTTGGCATGACTTTAAAACCAATGTCAATTTCTACAGGAAACAAAAGGAAGGTGCGTCTTTACCAGTTCCTCCTGGACCTCCTTCAGGACGGAGACATGAGGGACTGCATCTGGTGGGTGGACAGAGAGCGAGGCGTCTTTCAGTTCTCCTCCAAACACAAGGAGACACTCGCCAGCAAAAGGGCAACCGCAAGAGAATGACCTACCAAAAGATGGCAAGAGCCCTCCGCAACTACGGCAAGACCGGGGAGGTCAAAAAGGTCAAGAAGAAACTCACCT , 389																									389	27.9454
TTTTTGACAGTAATATTTGGCATGACTTTAAAACCAATGTCAATTTCTACAGGAAACAAAAGGAAGGTGCGTCTTTACCAGTTCCTCCTGGACCTCCTTCAGGACGGAGACATGAGGGACTGCATCTGGTGGGTGGACAGAGAGCGAGGCGTCTTTCAGTTCTCCTCCAAACACAAGGAGACACTGGGGCCAGCAAAAGGGCAACCGCAAGAGAATGACCTACCAAAAGATGGCAAGAGCCCTCCGCAACTACGGCAAGACCGGGGAGGTCAAAAAGGTCAAGAAGAAACTCACCT , 182																									182	13.0747
TTTTTGACAGTAATATTTGGCATGACTTTAAAACCAATGTCAATTTCTACAGGAAACAAAAGGAAGGTGCGTCTTTACCAGTTCCTCCTGGACCTCCTTCAGGACGGAGACATGAGGGACTGCATCTGGTGGGTGGACAGAGAGCGAGGCGTCTTTCAGTTCTCCTCCAAACACAAGGAGACACTCGCCAGCCGAGCAAAAGGGCAACCGCAAGAGAATGACCTACCAAAAGATGGCAAGAGCCCTCCGCAACTACGGCAAGACCGGGGAGGTCAAAAAGGTCAAGAAGAAACTCACCT , 182																									182	13.0747
TTTTTGACAGTAATATTTGGCATGACTTTAAAACCAATGTCAATTTCTACAGGAAACAAAAGGAAGGTGCGTCTTTACCAGTTCCTCCTGGACCTCCTTCAGGACGGAGACATGAGGGACTGCATCTGGTGGGTGGACAGAGAGCGAGGCGTCTTTCAGTTCTCCTCCAAACACAAGGAGACACTCGCCAGCCGGGGCCAGCAAAAGGGCAACCGCAAGAGAATGACCTACCAAAAGATGGCAAGAGCCCTCCGCAACTACGGCAAGACCGGGGAGGTCAAAAAGGTCAAGAAGAAACTCACCT , 107																									107	7.68678
TTTTTGACAGTAATATTTGGCATGACTTTAAAACCAATGTCAATTTCTACAGGAAACAAAAGGAAGGTGCGTCTTTACCAGTTCCTCCTGGACCTCCTTCAGGACGGAGACATGAGGGACTGCATCTGGTGGGTGGACAGAGAGCGAGGCGTCTTTCAGTTCTCCTCCAAACACAAGGAGACACTCGCCAGCTGGGGCCAGCAAAAGGGCAACCGCAAGAGAATGACCTACCAAAAGATGGCAAGAGCCCTCCGCAACTACGGCAAGACCGGGGAGGTCAAAAAGGTCAAGAAGAAACTCACCT , 86																									86	6.17816
TTTTTGACAGTAATATTTGGCATGACTTTAAAACCAATGTCAATTTCTACAGGAAACAAAAGGAAGGTGCGTCTTTACCAGTTCCTCCTGGACCTCCTTCAGGACGGAGACATGAGGGACTGCATCTGGTGGGTGGACAGAGAGCGAGGCGTCTTTCAGTTCTCCTCCAAACACAAGGAGACACTCGCCAGCCGTCCTTGTTACAGTGTAAACCAGCAAAAGGGCAGCAAAAGGGCAACCGCAAGAGAATGACCTACCAAAAGATGGCAAGAGCCCTCCGCAACTACGGCAAGACCGGGGAGGTCAAAAAGGTCAAGAAGAAACTCACCT , 84																									84	6.03448
TTTTTGACAGTAATATTTGGCATGACTTTAAAACCAATGTCAATTTCTACAGGAAACAAAAGGAAGGTGCGTCTTTACCAGTTCCTCCTGGACCTCCTTCAGGACGGAGACATGAGGGACTGCATCTGGTGGGTGGACAGAGAGCGAGGCGTCTTTCAGTTCTCCTCCAAACACAAGGAGACACTCGCCAGCAAAAGGGCCAGCAAAAGGGCAACCGCAAGAGAATGACCTACCAAAAGATGGCAAGAGCCCTCCGCAACTACGGCAAGACCGGGGAGGTCAAAAAGGTCAAGAAGAAACTCACCT , 74																									74	5.31609
TTTTTGACAGTAATATTTGGCATGACTTTAAAACCAATGTCAATTTCTACAGGAAACAAAAGGAAGGTGCGTCTTTACCAGTTCCTCCTGGACCTCCTTCAGGACGGAGACATGAGGGACTGCATCTGGTGGGGCCAGCAAAAGGGCAACCGCAAGAGAATGACCTACCAAAAGATGGCAAGAGCCCTCCGCAACTACGGCAAGACCGGGGAGGTCAAAAAGGTCAAGAAGAAACTCACCT , 68																									68	4.88506
TTTTTGACAGTAATATTTGGCATGACTTTAAAACCAATGTCAATTTCTACAGGAAACAAAAGGAAGGTGCGTCTTTACCAGTTCCTCCTGGACCTCCTTCAGGACGGAGACATGAGGGACTGCATCTGGTGGGTGGACAGAGAGCGAGGCGTCTTTCAGTTCTCCTCCAAACACAAGGAGACACTCGCCAGCCGAAAGGGCAACCGCAAGAGAATGACCTACCAAAAGATGGCAAGAGCCCTCCGCAACTACGGCAAGACCGGGGAGGTCAAAAAGGTCAAGAAGAAACTCACCT , 61																									61	4.38218
TTTTTGACAGTAATATTTGGCATGACTTTAAAACCAATGTCAATTTCTACAGGAAACAAAAGGAAGGTGCGTCTTTACCAGTTCCTCCTGGACCTCCTTCAGGACGGAGACATGAGGGACTGCATCTGGTGGGTGGACAGAGAGCGAGGCGTCTTTCAGTTCTCCTCCAAACACAAGGAGACACTCGCCAGCACTGGGGCCAGCAAAAGGGCAACCGCAAGAGAATGACCTACCAAAAGATGGCAAGAGCCCTCCGCAACTACGGCAAGACCGGGGAGGTCAAAAAGGTCAAGAAGAAACTCACCT , 56																									56	4.02299
TTTTTGACAGTAATATTTGGCATGACTTTAAAACCAATGTCAATTTCTACAGGAAACAAAAGGAAGGTGCGTCTTTACCAGTTCCTCCTGGACCTCCTTCAGGACGGAGACATGAGGGACTGCATCTGGTGGGTGGACAGAGAGCGAGGCGTCTTTCAGTTCTCCTCCAAACACAAGGGGCCAGCAAAAGGGCAACCGCAAGAGAATGACCTACCAAAAGATGGCAAGAGCCCTCCGCAACTACGGCAAGACCGGGGAGGTCAAAAAGGTCAAGAAGAAACTCACCT , 40																									40	2.87356
TTTTTGACAGTAATATTTGGCATGACTTTAAAACCAATGTCAATTTCTACAGGAAACAAAAGGAAGGTGCGTCTTTACCAGTTCCTCCTGGACCTCCTTCAGGACGGAGACATGAGGGACTGCATCTGGTGGGTGGACAGAGAGCGAGGCGTCTTTCAGTTCTCCTCCAAACACAAGGAGACACTCGCCTGGGGCCAGCAAAAGGGCAACCGCAAGAGAATGACCTACCAAAAGATGGCAAGAGCCCTCCGCAACTACGGCAAGACCGGGGAGGTCAAAAAGGTCAAGAAGAAACTCACCT , 36																									36	2.58621
INJECTED #5
TTTTTGACAGTAATATTTGGCATGACTTTAAAACCAATGTCAATTTCTACAGGAAACAAAAGGAAGGTGCGTCTTTACCAGTTCCTCCTGGACCTCCTTCAGGACGGAGACATGAGGGACTGCATCTGGTGGGTGGACAGAGAGCGAGGCGTCTTTCAGTTCTCCTCCAAACACAAGGAGACACTCGCCAGCCGCTGGGGCCAGCAAAAGGGCAACCGCAAGAGAATGACCTACCAAAAGATGGCAAGAGCCCTCCGCAACTACGGCAAGACCGGGGAGGTCAAAAAGGTCAAGAAGAAACTCACCT , WT																									0	0
TTTTTGACAGTAATATTTGGCATGACTTTAAAACCAATGTCAATTTCTACAGGAAACAAAAGGAAGGTGCGTCTTTACCAGTTCCTCCTGGACCTCCTTCAGGACGGAGACATGAGGGACTGCATCTGGTGGGTGGACAGAGAGCGAGGCGTCTTTCAGTTCTCCTCCAAACACAAGGAGACACTCGCCAGCCGGGGCCAGCAAAAGGGCAACCGCAAGAGAATGACCTACCAAAAGATGGCAAGAGCCCTCCGCAACTACGGCAAGACCGGGGAGGTCAAAAAGGTCAAGAAGAAACTCACCT , 334																									334	19.0097
TTTTTGACAGTAATATTTGGCATGACTTTAAAACCAATGTCAATTTCTACAGGAAACAAAAGGAAGGTGCGTCTTTACCAGTTCCTCCTGGACCTCCTTCAGGACGGAGACATGAGGGACTGCATCTGGTGGGTGGACAGAGAGCGAGGCGTCTTTCAGTTCTCCTCCAAACACAAGGAGACACTCGCCAGCAAAAGGGCAACCGCAAGAGAATGACCTACCAAAAGATGGCAAGAGCCCTCCGCAACTACGGCAAGACCGGGGAGGTCAAAAAGGTCAAGAAGAAACTCACCT , 266																									266	15.1394
TTTTTGACAGTAATATTTGGCATGACTTTAAAACCAATGTCAATTTCTACAGGAAACAAAAGGAAGGTGCGTCTTTACCAGTTCCTCCTGGACCTCCTTCAGGACGGAGACATGAGGGACTGCATCTGGTGGGTGGACAGAGAGCGAGGCGTCTTTCAGTTCTCCTCCAAACACAAGGAGACACTCGCCAGCAAAAGGGGCCAGCAAAAGGGCAACCGCAAGAGAATGACCTACCAAAAGATGGCAAGAGCCCTCCGCAACTACGGCAAGACCGGGGAGGTCAAAAAGGTCAAGAAGAAACTCACCT , 255																									255	14.5134
TTTTTGACAGTAATATTTGGCATGACTTTAAAACCAATGTCAATTTCTACAGGAAACAAAAGGAAGGTGCGTCTTTACCAGTTCCTCCTGGACCTCCTTCAGGACGGAGACATGAGGGACTGCATCTGGTGGGTGGACAGAGAGCGAGGCGTCTTTCAGTTCTCCTCCAAACACAAGGAGACACTCGCCAGCCGGGTCAGCAAAAGGGCAACCGCAAGAGAATGACCTACCAAAAGATGGCAAGAGCCCTCCGCAACTACGGCAAGACCGGGGAGGTCAAAAAGGTCAAGAAGAAACTCACCT , 203																									203	11.5538
TTTTTGACAGTAATATTTGGCATGACTTTAAAACCAATGTCAATTTCTACAGGAAACAAAAGGAAGGTGCGTCTTTACCAGTTCCTCCTGGACCTCCTTCAGGACGGAGACATGAGGGACTGCATCTGGTGGGTGGACAGAGAGCGAGGCGTCTTTCAGTTCTCCTCCAAACACAAGGAGACACTCGCCAGCCGGGTGTATTAATCTTTTGCTGGGGCCAGCAAAAGGGCAACCGCAAGAGAATGACCTACCAAAAGATGGCAAGAGCCCTCCGCAACTACGGCAAGACCGGGGAGGTCAAAAAGGTCAAGAAGAAACTCACCT , 160																									160	9.10643
TTTTTGACAGTAATATTTGGCATGACTTTAAAACCAATGTCAATTTCTACAGGAAACAAAAGGAAGGTGCGTCTTTACCAGTTCCTCCTGGACCTCCTTCAGGACGGAGACATGAGGGACTGCATCTGGTGGGTGGACAGAGAGCGAGGCGTCTTTCAGTTCTCCTCCAAACACAAGGAGACACTCGCCAGCCTGGGGCCAGCAAAAGGGCAACCGCAAGAGAATGACCTACCAAAAGATGGCAAGAGCCCTCCGCAACTACGGCAAGACCGGGGAGGTCAAAAAGGTCAAGAAGAAACTCACCT , 122																									122	6.94365
TTTTTGACAGTAATATTTGGCATGACTTTAAAACCAATGTCAATTTCTACAGGAAACAAAAGGAAGGTGCGTCTTTACCAGTTCCTCCTGGACCTCCTTCAGGACGGAGACATGAGGGACTGCATCTGGTGGGTGGACAGAGAGCGAGGCGTCTTTCAGTTCTCCTCCAAACACAAGGAGACACTGGGGCCAGCAAAAGGGCAACCGCAAGAGAATGACCTACCAAAAGATGGCAAGAGCCCTCCGCAACTACGGCAAGACCGGGGAGGTCAAAAAGGTCAAGAAGAAACTCACCT , 105																									105	5.9761
TTTTTGACAGTAATATTTGGCATGACTTTAAAACCAATGTCAATTTCTACAGGAAACAAAAGGAAGGTGCGTCTTTACCAGTTCCTCCTGGACCTCCTTCAGGACGGAGACATGAGGGACTGCATCTGGTGGGTGGACAGAGAGCGAGGCGTCTTTCAGTTCTCCTCCAAACACAAGGAGACACTCGCCAGCCGGGCCAGCAAAAGGCCAGCAAAAGGGCAACCGCAAGAGAATGACCTACCAAAAGATGGCAAGAGCCCTCCGCAACTACGGCAAGACCGGGGAGGTCAAAAAGGTCAAGAAGAAACTCACCT , 104																									104	5.91918
TTTTTGACAGTAATATTTGGCATGACTTTAAAACCAATGTCAATTTCTACAGGAAACAAAAGGAAGGTGCGTCTTTACCAGTTCCTCCTGGACCTCCTTCAGGACGGAGACATGAGGGACTGCATCTGGTGGGTGGACAGAGAGCGAGGCGTCTTTCAGTTCTCCTCCAAACACAAGGAGACACTCGCCAGCCGGGGCCAGCTGGGGCCAGCAAAAGGGCAACCGCAAGAGAATGACCTACCAAAAGATGGCAAGAGCCCTCCGCAACTACGGCAAGACCGGGGAGGTCAAAAAGGTCAAGAAGAAACTCACCT , 77																									77	4.38247
TTTTTGACAGTAATATTTGGCATGACTTTAAAACCAATGTCAATTTCTACAGGAAACAAAAGGAAGGTGCGTCTTTACCAGTTCCTCCTGGACCTCCTTCAGGACGGAGACATGAGGGACTGCATCTGGTGGGTGGACAGAGAGCGAGGCGTCTTTCAGTTCTCCTCCAAACACAAGGAGACACTCGCCAGCTGGGGCCAGCAAAAGGGCAACCGCAAGAGAATGACCTACCAAAAGATGGCAAGAGCCCTCCGCAACTACGGCAAGACCGGGGAGGTCAAAAAGGTCAAGAAGAAACTCACCT , 52																									52	2.95959
TTTTTGACAGTAATATTTGGCATGACTTTAAAACCAATGTCAATTTCTACAGGAAACAAAAGGAAGGTGCGTCTTTACCAGTTCCTCCTGGACCTCCTTCAGGACGGAGACATGAGGGACTGCATCTGGTGGGTGGACAGAGAGCGAGGCGTCTTTCAGTTCTCCTCCAAACACAAGGAGACACTCGCCAGACACTGGGGCCAGCAAAAGGGCAACCGCAAGAGAATGACCTACCAAAAGATGGCAAGAGCCCTCCGCAACTACGGCAAGACCGGGGAGGTCAAAAAGGTCAAGAAGAAACTCACCT , 42																									42	2.39044
TTTTTGACAGTAATATTTGGCATGACTTTAAAACCAATGTCAATTTCTACAGGAAACAAAAGGAAGGTGCGTCTTTACCAGTTCCTCCTGGACCTCCTTCAGGACGGAGACATGAGGGACTGCATCTGGTGGGTGGACAGAGAGCGAGGCGTCTTTCAGTTCTCCTCCAAACACAAGGAGACACTCGCCAGCCGAACACAAGGAGACACTGGGGCCAGCAAAAGGGCAACCGCAAGAGAATGACCTACCAAAAGATGGCAAGAGCCCTCCGCAACTACGGCAAGACCGGGGAGGTCAAAAAGGTCAAGAAGAAACTCACCT , 37																									37	2.10586
INJECTED #6
TTTTTGACAGTAATATTTGGCATGACTTTAAAACCAATGTCAATTTCTACAGGAAACAAAAGGAAGGTGCGTCTTTACCAGTTCCTCCTGGACCTCCTTCAGGACGGAGACATGAGGGACTGCATCTGGTGGGTGGACAGAGAGCGAGGCGTCTTTCAGTTCTCCTCCAAACACAAGGAGACACTCGCCAGCCGCTGGGGCCAGCAAAAGGGCAACCGCAAGAGAATGACCTACCAAAAGATGGCAAGAGCCCTCCGCAACTACGGCAAGACCGGGGAGGTCAAAAAGGTCAAGAAGAAACTCACCT , WT																									1	0.03885
TTTTTGACAGTAATATTTGGCATGACTTTAAAACCAATGTCAATTTCTACAGGAAACAAAAGGAAGGTGCGTCTTTACCAGTTCCTCCTGGACCTCCTTCAGGACGGAGACATGAGGGACTGCATCTGGTGGGTGGACAGAGAGCGAGGCGTCTTTCAGTTCTCCTCCAAACACAAGGAGACACTCGCCAGCCAGCAAAAGGGCAACCGCAAGAGAATGACCTACCAAAAGATGGCAAGAGCCCTCCGCAACTACGGCAAGACCGGGGAGGTCAAAAAGGTCAAGAAGAAACTCACCT , 732																									732	28.4382
TTTTTGACAGTAATATTTGGCATGACTTTAAAACCAATGTCAATTTCTACAGGAAACAAAAGGAAGGTGCGTCTTTACCAGTTCCTCCTGGACCTCCTTCAGGACGGAGACATGAGGGACTGCATCTGGTGGGTGGACAGAGAGCGAGGCGTCTTTCAGTTCTCCTCCAAACACAAGGAGACACTCGCCAGCAAAAGGGCAACCGCAAGAGAATGACCTACCAAAAGATGGCAAGAGCCCTCCGCAACTACGGCAAGACCGGGGAGGTCAAAAAGGTCAAGAAGAAACTCACCT , 550																									550	21.3675
TTTTTGACAGTAATATTTGGCATGACTTTAAAACCAATGTCAATTTCTACAGGAAACAAAAGGAAGGTGCGTCTTTACCAGTTCCTCCTGGACCTCCTTCAGGACGGAGACATGAGGGACTGCATCTGGTGGGTGGACAGAGAGCGAGGCGTCTTTCAGTTCTCCTCCAAACACAAGGAGACACTCGCCAGGGGCCAGCAAAAGGGCAACCGCAAGAGAATGACCTACCAAAAGATGGCAAGAGCCCTCCGCAACTACGGCAAGACCGGGGAGGTCAAAAAGGTCAAGAAGAAACTCACCT , 408																									408	15.8508
TTTTTGACAGTAATATTTGGCATGACTTTAAAACCAATGTCAATTTCTACAGGAAACAAAAGGAAGGTGCGTCTTTACCAGTTCCTCCTGGACCTCCTTCAGGACGGAGACATGAGGGACTGCATCTGGTGGGTGGACAGAGAGCGAGGCGTCTTTCAGTTCTCCTCCAAACACAAGGAGACACTCGCCAGCTGGGGCCAGCAAAAGGGCAACCGCAAGAGAATGACCTACCAAAAGATGGCAAGAGCCCTCCGCAACTACGGCAAGACCGGGGAGGTCAAAAAGGTCAAGAAGAAACTCACCT , 218																									218	8.46931
TTTTTGACAGTAATATTTGGCATGACTTTAAAACCAATGTCAATTTCTACAGGAAACAAAAGGAAGGTGCGTCTTTACCAGTTCCTCCTGGACCTCCTTCAGGACGGAGACATGAGGGACTGCATCTGGTGGGTGGACAGAGAGCGAGGCGTCTTTCAGTTCTCCTCCAAACACAAGGAGACACTCGCCAGATCTGTCGTAGTAAAAAGGCCAAATCTAGAACAGGGTTGTGGGGCCAGCAAAAGGGCAACCGCAAGAGAATGACCTACCAAAAGATGGCAAGAGCCCTCCGCAACTACGGCAAGACCGGGGAGGTCAAAAAGGTCAAGAAGAAACTCACCT , 211																									211	8.19736
TTTTTGACAGTAATATTTGGCATGACTTTAAAACCAATGTCAATTTCTACAGGAAACAAAAGGAAGGTGCGTCTTTACCAGTTCCTCCTGGACCTCCTTCAGGACGGAGACATGAGGGACTGCATCTGGTGGGTGGACAGAGAGCGAGGCGTCTTTCAGTTCTCCTCCAAACACAAGGAGACACTCGCCAGCCGGCAAAAGGGCAACCGCAAGAGAATGACCTACCAAAAGATGGCAAGAGCCCTCCGCAACTACGGCAAGACCGGGGAGGTCAAAAAGGTCAAGAAGAAACTCACCT , 124																									124	4.8174
TTTTTGACAGTAATATTTGGCATGACTTTAAAACCAATGTCAATTTCTACAGGAAACAAAAGGAAGGTGCGTCTTTACCAGTTCCTCCTGGACCTCCTTCAGGACGGAGACATGAGGGACTGCATCTGGTGGGTGGACAGAGAGCGAGGCGTCTTTCAGTTCTCCTCCAAACACAAGGAGACACTCGCCAGCCGGCCAGCAAAAGGGCAACCGCAAGAGAATGACCTACCAAAAGATGGCAAGAGCCCTCCGCAACTACGGCAAGACCGGGGAGGTCAAAAAGGTCAAGAAGAAACTCACCT , 112																									112	4.3512
TTTTTGACAGTAATATTTGGCATGACTTTAAAACCAATGTCAATTTCTACAGGAAACAAAAGGAAGGTGCGTCTTTACCAGTTCCTCCTGGACCTCCTTCAGGACGGAGACATGAGGGACTGCATCTGGTGGGTGGACAGAGAGCGAGGCGTCTTTCAGTTCTCCTCCAAACACAAGGAGACACTCGCCAGCCGAAAAAAGGGCAACCGCAAGAGAATGACCTACCAAAAGATGGCAAGAGCCCTCCGCAACTACGGCAAGACCGGGGAGGTCAAAAAGGTCAAGAAGAAACTCACCT , 61																									61	2.36985
TTTTTGACAGTAATATTTGGCATGACTTTAAAACCAATGTCAATTTCTACAGGAAACAAAAGGAAGGTGCGTCTTTACCAGTTCCTCCTGGACCTCCTTCAGGACGGAGACATGAGGGACTGCATCTGGTGGGTGGACAGAGAGCGAGGCGTCTTTCAGTTCTCCTCCAAACACAAGGAGACACTGGGGCCAGCAAAAGGGCAACCGCAAGAGAATGACCTACCAAAAGATGGCAAGAGCCCTCCGCAACTACGGCAAGACCGGGGAGGTCAAAAAGGTCAAGAAGAAACTCACCT , 54																									54	2.0979
TTTTTGACAGTAATATTTGGCATGACTTTAAAACCAATGTCAATTTCTACAGGAAACAAAAGGAAGGTGCGTCTTTACCAGTTCCTCCTGGACCTCCTTCAGGACGGAGACATGAGGGACTGCATCTGGTGGGTGGACAGAGAGCGAGGCGTCTTTCAGTTCTCCTCCAAACACAAGGAGACACTCGCCGCCAGCAAAAGGGCAACCGCAAGAGAATGACCTACCAAAAGATGGCAAGAGCCCTCCGCAACTACGGCAAGACCGGGGAGGTCAAAAAGGTCAAGAAGAAACTCACCT , 40																									40	1.554
TTTTTGACAGTAATATTTGGCATGACTTTAAAACCAATGTCAATTTCTACAGGAAACAAAAGGAAGGTGCGTCTTTACCAGTTCCTCCTGGACCTCCTTCAGGACGGAGACATGAGGGACTGCATCTGGTGGGTGGACAGAGAGCGAGGCGTCTTTCAGTTCTCCTCCAAACACAAGGAGACACTCGCCAGCCGAAAGGGCAACCGCAAGAGAATGACCTACCAAAAGATGGCAAGAGCCCTCCGCAACTACGGCAAGACCGGGGAGGTCAAAAAGGTCAAGAAGAAACTCACCT , 38																									38	1.4763
TTTTTGACAGTAATATTTGGCATGACTTTAAAACCAATGTCAATTTCTACAGGAAACAAAAGGAAGGTGCGTCTTTACCAGTTCCTCCTGGACCTCCTTCAGGACGGAGACATGAGGGACTGCATCTGGTGGGTGGACAGAGAGCGAGGCGTCTTTCAGTTCTCCTCCAAACACAAGGAGACACTCGCCAGCAAAAGGGCCAGCAAAAGGGCAACCGCAAGAGAATGACCTACCAAAAGATGGCAAGAGCCCTCCGCAACTACGGCAAGACCGGGGAGGTCAAAAAGGTCAAGAAGAAACTCACCT , 25																									25	0.971251
INJECTED #7
TTTTTGACAGTAATATTTGGCATGACTTTAAAACCAATGTCAATTTCTACAGGAAACAAAAGGAAGGTGCGTCTTTACCAGTTCCTCCTGGACCTCCTTCAGGACGGAGACATGAGGGACTGCATCTGGTGGGTGGACAGAGAGCGAGGCGTCTTTCAGTTCTCCTCCAAACACAAGGAGACACTCGCCAGCCGCTGGGGCCAGCAAAAGGGCAACCGCAAGAGAATGACCTACCAAAAGATGGCAAGAGCCCTCCGCAACTACGGCAAGACCGGGGAGGTCAAAAAGGTCAAGAAGAAACTCACCT , WT																									5	0.261233
TTTTTGACAGTAATATTTGGCATGACTTTAAAACCAATGTCAATTTCTACAGGAAACAAAAGGAAGGTGCGTCTTTACCAGTTCCTCCTGGACCTCCTTCAGGACGGAGACATGAGGGACTGCATCTGGTGGGTGGACAGAGAGCGAGGCGTCTTTCAGTTCTCCTCCAAACACAAGGAGACACTCGCCAGCAAAAGGGCAACCGCAAGAGAATGACCTACCAAAAGATGGCAAGAGCCCTCCGCAACTACGGCAAGACCGGGGAGGTCAAAAAGGTCAAGAAGAAACTCACCT , 837																									837	43.7304
TTTTTGACAGTAATATTTGGCATGACTTTAAAACCAATGTCAATTTCTACAGGAAACAAAAGGAAGGTGCGTCTTTACCAGTTCCTCCTGGACCTCCTTCAGGACGGAGACATGAGGGACTGCATCTGGTGGGTGGACAGAGAGCGAGGCGTCTTTCAGTTCTCCTCCAAACACAAGGAGACACTCGCCAGCCTGGGGCCAGCAAAAGGGCAACCGCAAGAGAATGACCTACCAAAAGATGGCAAGAGCCCTCCGCAACTACGGCAAGACCGGGGAGGTCAAAAAGGTCAAGAAGAAACTCACCT , 225																									225	11.7555
TTTTTGACAGTAATATTTGGCATGACTTTAAAACCAATGTCAATTTCTACAGGAAACAAAAGGAAGGTGCGTCTTTACCAGTTCCTCCTGGACCTCCTTCAGGACGGAGACATGAGGGACTGCATCTGGTGGGTGGACAGAGAGCGAGGCGTCTTTCAGTTCTCCTCCAAACACAAGGAGACACTCGCCAGCCGGGGCCAGCAAAAGGGCAACCGCAAGAGAATGACCTACCAAAAGATGGCAAGAGCCCTCCGCAACTACGGCAAGACCGGGGAGGTCAAAAAGGTCAAGAAGAAACTCACCT , 215																									215	11.233
TTTTTGACAGTAATATTTGGCATGACTTTAAAACCAATGTCAATTTCTACAGGAAACAAAAGGAAGGTGCGTCTTTACCAGTTCCTCCTGGACCTCCTTCAGGACGGAGACATGAGGGACTGCATCTGGTGGGTGGACAGAGAGCGAGGCGTCTTTCAGTTCTCCTCCAAACACAAGGAGACACTCGCCAGCTGGGGCCAGCAAAAGGGCAACCGCAAGAGAATGACCTACCAAAAGATGGCAAGAGCCCTCCGCAACTACGGCAAGACCGGGGAGGTCAAAAAGGTCAAGAAGAAACTCACCT , 109																									109	5.69488
TTTTTGACAGTAATATTTGGCATGACTTTAAAACCAATGTCAATTTCTACAGGAAACAAAAGGAAGGTGCGTCTTTACCAGTTCCTCCTGGACCTCCTTCAGGACGGAGACATGAGGGACTGCATCTGGTGGGTGGACAGAGAGCGAGGCGTCTTTCAGTTCTCCTCCAAACACAAGGAGACACTCGCCAGCCGTTTTGGAAACACTGGGGCCAGCAAAAGGGCAACCGCAAGAGAATGACCTACCAAAAGATGGCAAGAGCCCTCCGCAACTACGGCAAGACCGGGGAGGTCAAAAAGGTCAAGAAGAAACTCACCT , 86																									86	4.49321
TTTTTGACAGTAATATTTGGCATGACTTTAAAACCAATGTCAATTTCTACAGGAAACAAAAGGAAGGTGCGTCTTTACCAGTTCCTCCTGGACCTCCTTCAGGACGGAGACATGAGGGACTGCATCTGGTGGGTGGACAGAGAGCGAGGCGTCTTTCAGTTCTCCTCCAAACACAAGGAGACACTCGCCAGCCAGCTGGGGCCAGCCAGCTGGGGCCAGCAAAAGGGCAACCGCAAGAGAATGACCTACCAAAAGATGGCAAGAGCCCTCCGCAACTACGGCAAGACCGGGGAGGTCAAAAAGGTCAAGAAGAAACTCACCT , 75																									75	3.9185
TTTTTGACAGTAATATTTGGCATGACTTTAAAACCAATGTCAATTTCTACAGGAAACAAAAGGAAGGTGCGTCTTTACCAGTTCCTCCTGGACCTCCTTCAGGACGGAGACATGAGGGACTGCATCTGGTGGGTGGACAGAGAGCGAGGCGTCTTTCAGTTCTCCTCCAAACACAAGGAGACACTCGCCAGCAAAAGGGCAACCGCCAGCAAAAGGGCAACCGCAAGAGAATGACCTACCAAAAGATGGCAAGAGCCCTCCGCAACTACGGCAAGACCGGGGAGGTCAAAAAGGTCAAGAAGAAACTCACCT , 70																									70	3.65726
TTTTTGACAGTAATATTTGGCATGACTTTAAAACCAATGTCAATTTCTACAGGAAACAAAAGGAAGGTGCGTCTTTACCAGTTCCTCCTGGACCTCCTTCAGGACGGAGACATGAGGGACTGCATCTGGTGGGTGGACAGAGAGCGAGGCGTCTTTCAGTTCTCCTCCAAACACAAGGAGACACTCGCCAGCCGGCAAAAGGGCAACCGCAAGAGAATGACCTACCAAAAGATGGCAAGAGCCCTCCGCAACTACGGCAAGACCGGGGAGGTCAAAAAGGTCAAGAAGAAACTCACCT , 62																									62	3.23929
TTTTTGACAGTAATATTTGGCATGACTTTAAAACCAATGTCAATTTCTACAGGAAACAAAAGGAAGGTGCGTCTTTACCAGTTCCTCCTGGACCTCCTTCAGGACGGAGACATGAGGGACTGCATCTGGTGGGTGGACAGAGAGCGAGGCGTCTTTCAGTTCTCCTCCAAACACAAGGAGACACTCGCCAGCCGAGCAAAAGGCCAGCAAAAGGGCAACCGCAAGAGAATGACCTACCAAAAGATGGCAAGAGCCCTCCGCAACTACGGCAAGACCGGGGAGGTCAAAAAGGTCAAGAAGAAACTCACCT , 62																									62	3.23929
TTTTTGACAGTAATATTTGGCATGACTTTAAAACCAATGTCAATTTCTACAGGAAACAAAAGGAAGGTGCGTCTTTACCAGTTCCTCCTGGACCTCCTTCAGGACGGAGACATGAGGGACTGCATCTGGTGGGTGGACAGAGAGCGAGGCGTCTTTCAGTTCTCCTCCAAACACAAGGAGACACTCGCCAGCAAACTCCAAACACAAGGAGACACTGGCCAGCAAAAGGGCAACCGCAAGAGAATGACCTACCAAAAGATGGCAAGAGCCCTCCGCAACTACGGCAAGACCGGGGAGGTCAAAAAGGTCAAGAAGAAACTCACCT , 57																									57	2.97806
TTTTTGACAGTAATATTTGGCATGACTTTAAAACCAATGTCAATTTCTACAGGAAACAAAAGGAAGGTGCGTCTTTACCAGTTCCTCCTGGACCTCCTTCAGGACGGAGACATGAGGGACTGCATCTGGTGGGTGGACAGAGAGCGAGGCGTCTTTCAGTTCTCCTCCAAACACAAGGAGACACTCGCCAGCAAGGACAAGGAGACACAAGGAGACACTGGGGCCAGCAAAAGGGCAACCGCAAGAGACAACCGCAAGAGAATGACCTACCAAAAGATGGCAAGAGCCCTCCGCAACTACGGCAAGACCGGGGAGGTCAAAAAGGTCAAGAAGAAACTCACCT , 56																									56	2.92581
TTTTTGACAGTAATATTTGGCATGACTTTAAAACCAATGTCAATTTCTACAGGAAACAAAAGGAAGGTGCGTCTTTACCAGTTCCTCCTGGACCTCCTTCAGGACGGAGACATGAGGGACTGCATCTGGTGGGTGGACAGAGAGCGAGGCGTCTTTCAGTTCTCCTCCAAACACAAGGAGACACTGGGGCCAGCAAAAGGGCAACCGCAAGAGAATGACCTACCAAAAGATGGCAAGAGCCCTCCGCAACTACGGCAAGACCGGGGAGGTCAAAAAGGTCAAGAAGAAACTCACCT , 55																									55	2.87356
INJECTED #8
TTTTTGACAGTAATATTTGGCATGACTTTAAAACCAATGTCAATTTCTACAGGAAACAAAAGGAAGGTGCGTCTTTACCAGTTCCTCCTGGACCTCCTTCAGGACGGAGACATGAGGGACTGCATCTGGTGGGTGGACAGAGAGCGAGGCGTCTTTCAGTTCTCCTCCAAACACAAGGAGACACTCGCCAGCCGCTGGGGCCAGCAAAAGGGCAACCGCAAGAGAATGACCTACCAAAAGATGGCAAGAGCCCTCCGCAACTACGGCAAGACCGGGGAGGTCAAAAAGGTCAAGAAGAAACTCACCT , WT																									5	0.293427
TTTTTGACAGTAATATTTGGCATGACTTTAAAACCAATGTCAATTTCTACAGGAAACAAAAGGAAGGTGCGTCTTTACCAGTTCCTCCTGGACCTCCTTCAGGACGGAGACATGAGGGACTGCATCTGGTGGGTGGACAGAGAGCGAGGCGTCTTTCAGTTCTCCTCCAAACACAAGGAGACACTCGCCAGCAAAAGGGCAACCGCAAGAGAATGACCTACCAAAAGATGGCAAGAGCCCTCCGCAACTACGGCAAGACCGGGGAGGTCAAAAAGGTCAAGAAGAAACTCACCT , 365																									365	21.4202
TTTTTGACAGTAATATTTGGCATGACTTTAAAACCAATGTCAATTTCTACAGGAAACAAAAGGAAGGTGCGTCTTTACCAGTTCCTCCTGGACCTCCTTCAGGACGGAGACATGAGGGACTGCATCTGGTGGGTGGACAGAGAGCGAGGCGTCTTTCAGTTCTCCTCCAAACACAAGGAGACACTCGCCAGCTGGGGCCAGCAAAAGGGCAACCGCAAGAGAATGACCTACCAAAAGATGGCAAGAGCCCTCCGCAACTACGGCAAGACCGGGGAGGTCAAAAAGGTCAAGAAGAAACTCACCT , 318																									318	18.662
TTTTTGACAGTAATATTTGGCATGACTTTAAAACCAATGTCAATTTCTACAGGAAACAAAAGGAAGGTGCGTCTTTACCAGTTCCTCCTGGACCTCCTTCAGGACGGAGACATGAGGGACTGCATCTGGTGGGTGGACAGAGAGCGAGGCGTCTTTCAGTTCTCCTCCAAACACAAGGAGACACTCGCCAGCCGGGGCCAGCAAAAGGGGCCAGCAAAAGGGCAACCGCAAGAGAATGACCTACCAAAAGATGGCAAGAGCCCTCCGCAACTACGGCAAGACCGGGGAGGTCAAAAAGGTCAAGAAGAAACTCACCT , 266																									266	15.6103
TTTTTGACAGTAATATTTGGCATGACTTTAAAACCAATGTCAATTTCTACAGGAAACAAAAGGAAGGTGCGTCTTTACCAGTTCCTCCTGGACCTCCTTCAGGACGGAGACATGAGGGACTGCATCTGGTGGGTGGACAGAGAGCGAGGCGTCTTTCAGTTCTCCTCCAAACACAAGGAGAACTGAAAGGGGCCAGCAAAAGGGCAACCGCAAGAGAATGACCTACCAAAAGATGGCAAGAGCCCTCCGCAACTACGGCAAGACCGGGGAGGTCAAAAAGGTCAAGAAGAAACTCACCT , 239																									239	14.0258
TTTTTGACAGTAATATTTGGCATGACTTTAAAACCAATGTCAATTTCTACAGGAAACAAAAGGAAGGTGCGTCTTTACCAGTTCCTCCTGGACCTCCTTCAGGACGGAGACATGAGGGACTGCATCTGGTGGGTGGACAGAGAGCGAGGCGTCTTTCAGTTCTCCTCCAAACACAAGGAGACACTCGCCAGCCGGCAAAAGGGCAACCGCAAGAGAATGACCTACCAAAAGATGGCAAGAGCCCTCCGCAACTACGGCAAGACCGGGGAGGTCAAAAAGGTCAAGAAGAAACTCACCT , 175																									175	10.27
TTTTTGACAGTAATATTTGGCATGACTTTAAAACCAATGTCAATTTCTACAGGAAACAAAAGGAAGGTGCGTCTTTACCAGTTCCTCCTGGACCTCCTTCAGGACGGAGACATGAGGGACTGCATCTGGTGGGTGGACAGAGAGCGAGGCGTCTTTCAGTTCTCCTCCAAACACAAGGAGACACTCGCCAGCCGGGGCCAGCAAAAGGGCAACCGCAAGAGAATGACCTACCAAAAGATGGCAAGAGCCCTCCGCAACTACGGCAAGACCGGGGAGGTCAAAAAGGTCAAGAAGAAACTCACCT , 154																									154	9.03756
TTTTTGACAGTAATATTTGGCATGACTTTAAAACCAATGTCAATTTCTACAGGAAACAAAAGGAAGGTGCGTCTTTACCAGTTCCTCCTGGACCTCCTTCAGGACGGAGACATGAGGGACTGCATCTGGTGGGTGGACAGAGAGCGAGGCGTCTTTCAGTTCTCCTCCAAACACAAGGAGACACTCACCAGCTGGGGCCAGCAAAAGGGCAACCGCAAGAGAATGACCTACCAAAAGATGGCAAGAGCCCTCCGCAACTACGGCAAGACCGGGGAGGTCAAAAAGGTCAAGAAGAAACTCACCT , 62																									62	3.6385
TTTTTGACAGTAATATTTGGCATGACTTTAAAACCAATGTCAATTTCTACAGGAAACAAAAGGAAGGTGCGTCTTTACCAGTTCCTCCTGGACCTCCTTCAGGACGGAGACATGAGGGACTGCATCTGGTGGGTGGACAGAGAGCGAGGCGTCTTTCAGTTCTCCTCCAAACACAAGGAGACACTCGCCAGCGGTTGCAAAAGGGCAACCGCAAGAGAATGACCTACCAAAAGATGGCAAGAGCCCTCCGCAACTACGGCAAGACCGGGGAGGTCAAAAAGGTCAAGAAGAAACTCACCT , 33																									33	1.93662
TTTTTGACAGTAATATTTGGCATGACTTTAAAACCAATGTCAATTTCTACAGGAAACAAAAGGAAGGTGCGTCTTTACCAGTTCCTCCTGGACCTCCTTCAGGACGGAGACATGAGGGACTGCATCTGGTGGGTGGACAGAGAGCGAGGCGTCTTTCAGTTCTCCTCCAAACACAAGGAGACACTCGCCAGCCAGCAAAAGGGCAACCGCAAGAGAATGACCTACCAAAAGATGGCAAGAGCCCTCCGCAACTACGGCAAGACCGGGGAGGTCAAAAAGGTCAAGAAGAAACTCACCT , 27																									27	1.58451
TTTTTGACAGTAATATTTGGCATGACTTTAAAACCAATGTCAATTTCTACAGGAAACAAAAGGAAGGTGCGTCTTTACCAGTTCCTCCTGGACCTCCTTCAGGACGGAGACATGAGGGACTGCATCTGGTGGGTGGACAGAGAGCGAGGCGTCTTTCAGTTCTCCTCCAAACACAAGGAGACACTCGCTGGGGCCAGCAAAAGGGCAACCGCAAGAGAATGACCTACCAAAAGATGGCAAGAGCCCTCCGCAACTACGGCAAGACCGGGGAGGTCAAAAAGGTCAAGAAGAAACTCACCT , 24																									24	1.40845
TTTTTGACAGTAATATTTGGCATGACTTTAAAACCAATGTCAATTTCTACAGGAAACAAAAGGAAGGTGCGTCTTTACCAGTTCCTCCTGGACCTCCTTCAGGACGGAGACATGAGGGACTGCATCTGGTGGGTGGACAGAGAGCGAGGCGTCTTTCAGTTCTCCTCCAAACACAAGGAGACACTCGCCAGCCGTTTTGGAAACACTGGGGCCAGCAAAAGGGCAACCGCAAGAGAATGACCTACCAAAAGATGGCAAGAGCCCTCCGCAACTACGGCAAGACCGGGGAGGTCAAAAAGGTCAAGAAGAAACTCACCT , 20																									20	1.17371
TTTTTGACAGTAATATTTGGCATGACTTTAAAACCAATGTCAATTTCTACAGGAAACAAAAGGAAGGTGCGTCTTTACCAGTTCCTCCTGGACCTCCTTCAGGACGGAGACATGAGGGACTGCATCTGGTGGGTGGACAGAGAGCGAGGCGTCTTTCAGTTCTCCTCCAAACACAAGGAGACACTCGCCAGACACTGGGGCCAGCAAAAGGGCAACCGCAAGAGAATGACCTACCAAAAGATGGCAAGAGCCCTCCGCAACTACGGCAAGACCGGGGAGGTCAAAAAGGTCAAGAAGAAACTCACCT , 16																									16	0.938967
INJECTED #9
TTTTTGACAGTAATATTTGGCATGACTTTAAAACCAATGTCAATTTCTACAGGAAACAAAAGGAAGGTGCGTCTTTACCAGTTCCTCCTGGACCTCCTTCAGGACGGAGACATGAGGGACTGCATCTGGTGGGTGGACAGAGAGCGAGGCGTCTTTCAGTTCTCCTCCAAACACAAGGAGACACTCGCCAGCCGCTGGGGCCAGCAAAAGGGCAACCGCAAGAGAATGACCTACCAAAAGATGGCAAGAGCCCTCCGCAACTACGGCAAGACCGGGGAGGTCAAAAAGGTCAAGAAGAAACTCACCT , WT																									87	4.60805
TTTTTGACAGTAATATTTGGCATGACTTTAAAACCAATGTCAATTTCTACAGGAAACAAAAGGAAGGTGCGTCTTTACCAGTTCCTCCTGGACCTCCTTCAGGACGGAGACATGAGGGACTGCATCTGGTGGGTGGACAGAGAGCGAGGCGTCTTTCAGTTCTCCTCCAAACACAAGGAGACACTCGCCAGCAAAAGGGCAACCGCAAGAGAATGACCTACCAAAAGATGGCAAGAGCCCTCCGCAACTACGGCAAGACCGGGGAGGTCAAAAAGGTCAAGAAGAAACTCACCT , 555																									555	29.3962
TTTTTGACAGTAATATTTGGCATGACTTTAAAACCAATGTCAATTTCTACAGGAAACAAAAGGAAGGTGCGTCTTTACCAGTTCCTCCTGGACCTCCTTCAGGACGGAGACATGAGGGACTGCATCTGGTGGGTGGACAGAGAGCGAGGCGTCTTTCAGTTCTCCTCCAAACACAAGGAGACACTCGCCAGCCAGACACTGGGGCCAGCAAAAGGGCAACCGCAAGAGAATGACCTACCAAAAGATGGCAAGAGCCCTCCGCAACTACGGCAAGACCGGGGAGGTCAAAAAGGTCAAGAAGAAACTCACCT , 382																									382	20.2331
TTTTTGACAGTAATATTTGGCATGACTTTAAAACCAATGTCAATTTCTACAGGAAACAAAAGGAAGGTGCGTCTTTACCAGTTCCTCCTGGACCTCCTTCAGGACGGAGACATGAGGGACTGCATCTGGTGGGTGGACAGAGAGCGAGGCGTCTTTCAGTTCTCCTCCAAACACAAGGAGACACTCGCCAGGGGCCAGCAAAAGGGCAACCGCAAGAGAATGACCTACCAAAAGATGGCAAGAGCCCTCCGCAACTACGGCAAGACCGGGGAGGTCAAAAAGGTCAAGAAGAAACTCACCT , 191																									191	10.1165
TTTTTGACAGTAATATTTGGCATGACTTTAAAACCAATGTCAATTTCTACAGGAAACAAAAGGAAGGTGCGTCTTTACCAGTTCCTCCTGGACCTCCTTCAGGACGGAGACATGAGGGACTGCATCTGGTGGGTGGACAGAGAGCGAGGCGTCTTTCAGTTCTCCTCCAAACACAAGGAGACACTGGGGCCAGCAAAAGGGCAACCGCAAGAGAATGACCTACCAAAAGATGGCAAGAGCCCTCCGCAACTACGGCAAGACCGGGGAGGTCAAAAAGGTCAAGAAGAAACTCACCT , 137																									137	7.25636
TTTTTGACAGTAATATTTGGCATGACTTTAAAACCAATGTCAATTTCTACAGGAAACAAAAGGAAGGTGCGTCTTTACCAGTTCCTCCTGGACCTCCTTCAGGACGGAGACATGAGGGACTGCATCTGGTGGGTGGACAGAGAGCGAGGCGTCTTTCAGTTCTCCTCCAAACACAAGGAGACACTCGCCAGCCGAGTTTTTTAAGAGAGAGAGGTACTGGGGCCAGCAAAAGGGCAACCGCAAGAGAATGACCTACCAAAAGATGGCAAGAGCCCTCCGCAACTACGGCAAGACCGGGGAGGTCAAAAAGGTCAAGAAGAAACTCACCT , 122																									122	6.46186
TTTTTGACAGTAATATTTGGCATGACTTTAAAACCAATGTCAATTTCTACAGGAAACAAAAGGAAGGTGCGTCTTTACCAGTTCCTCCTGGACCTCCTTCAGGACGGAGACATGAGGGACTGCATCTGGTGGGTGGACAGAGAGCGAGGCGTCTTTCAGTTCTCCTCCAAACACAAGGAGACTGGGGCCAGCAAAAGGGCAACCGCAAGAGAATGACCTACCAAAAGATGGCAAGAGCCCTCCGCAACTACGGCAAGACCGGGGAGGTCAAAAAGGTCAAGAAGAAACTCACCT , 95																									95	5.03178
TTTTTGACAGTAATATTTGGCATGACTTTAAAACCAATGTCAATTTCTACAGGAAACAAAAGGAAGGTGCGTCTTTACCAGTTCCTCCTGGACCTCCTTCAGGACGGAGACATGAGGGACTGCATCTGGTGGGTGGACAGAGAGCGAGGCGTCTTTCAGTTCTCCTCCAAACACAAGGAGACACTCGCCAGCCGAAAAGGGGCCAGCAAAAGGGCAACCGCAAGAGAATGACCTACCAAAAGATGGCAAGAGCCCTCCGCAACTACGGCAAGACCGGGGAGGTCAAAAAGGTCAAGAAGAAACTCACCT , 82																									82	4.34322
TTTTTGACAGTAATATTTGGCATGACTTTAAAACCAATGTCAATTTCTACAGGAAACAAAAGGAAGGTGCGTCTTTACCAGTTCCTCCTGGACCTCCTTCAGGACGGAGACATGAGGGACTGCATCTGGTGGGTGGACAGAGAGCGAGGCGTCTTTCAGTTCTCCTCCAAACACAAGGAGACACTCGCCAGCCGCTGGGGCCAGCAAAAGGGCAACCGCAAGAGAATGACCTACCAAAAGATGGCAAGAGCCCTCCGCAACTACGGCAAGACCGGGGAGGTCAAAAAGGTCAAGAAGAAACTCACCT , 76																									76	4.02542
TTTTTGACAGTAATATTTGGCATGACTTTAAAACCAATGTCAATTTCTACAGGAAACAAAAGGAAGGTGCGTCTTTACCAGTTCCTCCTGGACCTCCTTCAGGACGGAGACATGAGGGACTGCATCTGGTGGGTGGACAGAGAGCGAGGCGTCTTTCAGTTCTCCTCCAAACACAAGGAGACACTCGCCAGCCGGGGCCAGCAAAAGGGCAACCGCAAGAGAATGACCTACCAAAAGATGGCAAGAGCCCTCCGCAACTACGGCAAGACCGGGGAGGTCAAAAAGGTCAAGAAGAAACTCACCT , 63																									63	3.33686
TTTTTGACAGTAATATTTGGCATGACTTTAAAACCAATGTCAATTTCTACAGGAAACAAAAGGAAGGTGCGTCTTTACCAGTTCCTCCTGGACCTCCTTCAGGACGGAGACATGAGGGACTGCATCTGGTGGGTGGACAGAGAGCGAGGCGTCTTTTCAGTTCTCCTCCAAACACAAGGAGACACTCGCCAGCTCTTTTTCTGGGGCCAGCAAAAGGGCAACCGCAAGAGAATGACCTACCAAAAGATGGCAAGAGCCCTCCGCAACTACGGCAAGACCGGGGAGGTCAAAAAGGTCAAGAAGAAACTCACCT , 47																									47	2.48941
TTTTTGACAGTAATATTTGGCATGACTTTAAAACCAATGTCAATTTCTACAGGAAACAAAAGGAAGGTGCGTCTTTACCAGTTCCTCCTGGACCTCCTTCAGGACGGAGACATGAGGGACTGCATCTGGTGGGTGGACAGAGAGCGAGGCGTCTTTCAGTTCTCCTCCAAACACAAGGAGACACTCGCCAGCCAGCAAAAGGGCAACCGCAAGAGAATGACCTACCAAAAGATGGCAAGAGCCCTCCGCAACTACGGCAAGACCGGGGAGGTCAAAAAGGTCAAGAAGAAACTCACCT , 36																									36	1.90678
TTTTTGACAGTAATATTTGGCATGACTTTAAAACCAATGTCAATTTCTACAGGAAACAAAAGGAAGGTGCGTCTTTACCAGTTCCTCCTGGACCTCCTTCAGGACGGAGACATGAGGGACTGCATCTGGTGGGTGGACAGAGAGCGAGGCGTCTTTCAGTTCTCCTCCAAACACAAGGAGACACTCGCCAGCGGAGGGCTCTTGCCATCTTTTGGTAGGTCATTCTCTTGCGGTTGCCCTTTTGCTGGCCCTCCGCAACTACGGCAAGACCGGGGAGGTCAAAAAGGTCAAGAAGAAACTCACCT , 15																									15	0.794492
INJECTED #10
TTTTTGACAGTAATATTTGGCATGACTTTAAAACCAATGTCAATTTCTACAGGAAACAAAAGGAAGGTGCGTCTTTACCAGTTCCTCCTGGACCTCCTTCAGGACGGAGACATGAGGGACTGCATCTGGTGGGTGGACAGAGAGCGAGGCGTCTTTCAGTTCTCCTCCAAACACAAGGAGACACTCGCCAGCCGCTGGGGCCAGCAAAAGGGCAACCGCAAGAGAATGACCTACCAAAAGATGGCAAGAGCCCTCCGCAACTACGGCAAGACCGGGGAGGTCAAAAAGGTCAAGAAGAAACTCACCT , WT																									0	0
TTTTTGACAGTAATATTTGGCATGACTTTAAAACCAATGTCAATTTCTACAGGAAACAAAAGGAAGGTGCGTCTTTACCAGTTCCTCCTGGACCTCCTTCAGGACGGAGACATGAGGGACTGCATCTGGTGGGTGGACAGAGAGCGAGGCGTCTTTCAGTTCTCCTCCAAACACAAGGAGACACTCGCCAGCAAAAGGGCAACCGCAAGAGAATGACCTACCAAAAGATGGCAAGAGCCCTCCGCAACTACGGCAAGACCGGGGAGGTCAAAAAGGTCAAGAAGAAACTCACCT , 682																									682	38.1645
TTTTTGACAGTAATATTTGGCATGACTTTAAAACCAATGTCAATTTCTACAGGAAACAAAAGGAAGGTGCGTCTTTACCAGTTCCTCCTGGACCTCCTTCAGGACGGAGACATGAGGGACTGCATCTGGTGGGTGGACAGAGAGCGAGGCGTCTTTCAGTTCTCCTCCAAACACAAGGAGACACTCGCCAGCCTACTGGGGCCAGCAAAAGGGCAACCGCAAGAGAATGACCTACCAAAAGATGGCAAGAGCCCTCCGCAACTACGGCAAGACCGGGGAGGTCAAAAAGGTCAAGAAGAAACTCACCT , 254																									254	14.2138
TTTTTGACAGTAATATTTGGCATGACTTTAAAACCAATGTCAATTTCTACAGGAAACAAAAGGAAGGTGCGTCTTTACCAGTTCCTCCTGGACCTCCTTCAGGACGGAGACATGAGGGACTGCATCTGGTGGGTGGACAGAGAGCGAGGCGTCTTTCAGTTCTCCTCCAAACACAAGGAGACACTGGGGCCAGCAAAAGGGCAACCGCAAGAGAATGACCTACCAAAAGATGGCAAGAGCCCTCCGCAACTACGGCAAGACCGGGGAGGTCAAAAAGGTCAAGAAGAAACTCACCT , 150																									150	8.39396
TTTTTGACAGTAATATTTGGCATGACTTTAAAACCAATGTCAATTTCTACAGGAAACAAAAGGAAGGTGCGTCTTTACCAGTTCCTCCTGGACCTCCTTCAGGACGGAGACATGAGGGACTGCATCTGGTGGGTGGACAGAGAGCGAGGCGTCTTTCAGTTCTCCTCCAAACACAAGGAGACACTCGCCAGCTGGGGCCAGCAAAAGGGCAACCGCAAGAGAATGACCTACCAAAAGATGGCAAGAGCCCTCCGCAACTACGGCAAGACCGGGGAGGTCAAAAAGGTCAAGAAGAAACTCACCT , 137																									137	7.66648
TTTTTGACAGTAATATTTGGCATGACTTTAAAACCAATGTCAATTTCTACAGGAAACAAAAGGAAGGTGCGTCTTTACCAGTTCCTCCTGGACCTCCTTCAGGACGGAGACATGAGGGACTGCATCTGGTGGGTGGACAGAGAGCGAGGCGTCTTTCAGTTCTCCTCCAAACACAAGGAGACACTCGCCAGCCGGGGCCAGCAAAAGGGCAACCGCAAGAGAATGACCTACCAAAAGATGGCAAGAGCCCTCCGCAACTACGGCAAGACCGGGGAGGTCAAAAAGGTCAAGAAGAAACTCACCT , 121																									121	6.77112
TTTTTGACAGTAATATTTGGCATGACTTTAAAACCAATGTCAATTTCTACAGGAAACAAAAGGAAGGTGCGTCTTTACCAGTTCCTCCTGGACCTCCTTCAGGACGGAGACATGAGGGACTGCATCTGGTGGGTGGACAGAGAGCGAGGCGTCTTTCAGTTCTCCTCCAAACACAAGGAGACACTCGCCAGCCGGTTCAGCTGGGGCCAGCAAAAGGGCAACCGCAAGAGAATGACCTACCAAAAGATGGCAAGAGCCCTCCGCAACTACGGCAAGACCGGGGAGGTCAAAAAGGTCAAGAAGAAACTCACCT , 119																									119	6.65921
TTTTTGACAGTAATATTTGGCATGACTTTAAAACCAATGTCAATTTCTACAGGAAACAAAAGGAAGGTGCGTCTTTACCAGTTCCTCCTGGACCTCCTTCAGGACGGAGACATGAGGGACTGCATCTGGTGGGTGGACAGAGAGCGAGGCGTCTTTCAGTTCTCCTCCAAACACAAGGAGACACTCTCCTTGTGTTTGGGGCCAGCAAAAGGGCAACCGCAAGAGAATGACCTACCAAAAGATGGCAAGAGCCCTCCGCAACTACGGCAAGACCGGGGAGGTCAAAAAGGTCAAGAAGAAACTCACCT , 67																									67	3.7493
TTTTTGACAGTAATATTTGGCATGACTTTAAAACCAATGTCAATTTCTACAGGAAACAAAAGGAAGGTGCGTCTTTACCAGTTCCTCCTGGACCTCCTTCAGGACGGAGACATGAGGGACTGCATCTGGTGGGTGGACAGAGAGCGAGGCGTCTTTCAGTTCTCCTCCAAACACAAGGAGACACTCGCCAGCCAGCAAAAGGGCAACCGCAAGAGAATGACCTACCAAAAGATGGCAAGAGCCCTCCGCAACTACGGCAAGACCGGGGAGGTCAAAAAGGTCAAGAAGAAACTCACCT , 62																									62	3.4695
TTTTTGACAGTAATATTTGGCATGACTTTAAAACCAATGTCAATTTCTACAGGAAACAAAAGGAAGGTGCGTCTTTACCAGTTCCTCCTGGACCTCCTTCAGGACGGAGACATGAGGGACTGCATCTGGTGGGTGGACAGAGAGCGAGGCGTCTTTCAGTTCTCCTCCAAACACAAGGAGACACTCGCCAGCCAAAAAGGGCAACCGCAAGAGAATGACCTACCAAAAGATGGCAAGAGCCCTCCGCAACTACGGCAAGACCGGGGAGGTCAAAAAGGTCAAGAAGAAACTCACCT , 62																									62	3.4695
TTTTTGACAGTAATATTTGGCATGACTTTAAAACCAATGTCAATTTCTACAGGAAACAAAAGGAAGGTGCGTCTTTACCAGTTCCTCCTGGACCTCCTTCAGGACGGAGACATGAGGGACTGCATCTGGTGGGTGGACAGAGAGCGAGGTCAGCAAAAGGGCAACCGCAAGAGAATGACCTACCAAAAGATGGCAAGAGCCCTCCGCAACTACGGCAAGACCGGGGAGGTCAAAAAGGTCAAGAAGAAACTCACCT , 52																									52	2.9099
TTTTTGACAGTAATATTTGGCATGACTTTAAAACCAATGTCAATTTCTACAGGAAACAAAAGGAAGGTGCGTCTTTACCAGTTCCTCCTGGACCTCCTTCAGGACGGAGACATGAGGGACTGCATCTGGTGGGTGGGTGGACAGAGAGCGAGGCGTCTTTCAGTTCTCCTCCAAACACAAGGAGACACTCGCCAGCCGGGGCAACCGCAAGAGAATGACCTACCAAAAGATGGCAAGAGCCCTCCGCAACTACGGCAAGACCGGGGAGGTCAAAAAGGTCAAGAAGAAACTCACCT , 43																									43	2.40627
TTTTTGACAGTAATATTTGGCATGACTTTAAAACCAATGTCAATTTCTACAGGAAACAAAAGGAAGGTGCGTCTTTACCAGTTCCTCCTGGACCTCCTTCAGGACGGAGACATGAGGGACTGCATCTGGTGGGTGGACAGAGAGCGAGGCGTCTTTCAGTTCTCCTCCAAACACAAGGAGACACTCGCCAGCCGACACTGGGGCCAGCAAAAGGGCAACCGCAAGAGAATGACCTACCAAAAGATGGCAAGAGCCCTCCGCAACTACGGCAAGACCGGGGAGGTCAAAAAGGTCAAGAAGAAACTCACCT , 38																									38	2.12647
